# Supplementary material
Source: PubMed Central journal article supplement (PMC5308562)
Supplement: NIHMS838638-supplement-Supplemental_Pub_Material.pdf [file NIHMS838638-supplement-Supplemental_Pub_Material.pdf]

## **SUPPLEMENTAL MATERIAL**

**Supplementary Table 1.** Hazard ratios (95% confidence intervals) for preterm delivery in first pregnancy and MI and stroke

|                              | Term:<br>≥37 weeks<br>(n=64,004) | Preterm:<br><37 weeks<br>(n=6,178) | Moderate Preterm:<br>≥32 to <37 weeks<br>(n=4,712) | Very Preterm:<br><32 weeks<br>(n=1,466) |
|------------------------------|----------------------------------|------------------------------------|----------------------------------------------------|-----------------------------------------|
| <b>Myocardial Infarction</b> |                                  |                                    |                                                    |                                         |
| Cases/Person-Years*          | 429/2,023,726                    | 68/189,048                         | 44/143,199                                         | 24/45,849                               |
| Model 1 <sup>†</sup>         | 1.00 (ref)                       | 1.71 (1.33, 2.22)                  | 1.48 (1.08, 2.01)                                  | 2.43 (1.61, 3.67)                       |
| Model 2 <sup>‡</sup>         | 1.00 (ref)                       | 1.63 (1.26, 2.12)                  | 1.45 (1.06, 1.98)                                  | 2.17 (1.42, 3.31)                       |
| Model 3 <sup>‡</sup>         | 1.00 (ref)                       | 1.55 (1.19, 2.01)                  | 1.36 (0.99, 1.86)                                  | 2.10 (1.38, 3.21)                       |
| <b>Stroke</b>                |                                  |                                    |                                                    |                                         |
| Cases/Person-Years*          | 404/2,023,726                    | 51/189,048                         | 32/143,199                                         | 19/45,849                               |
| Model 1 <sup>‡</sup>         | 1.00 (ref)                       | 1.37 (1.02, 1.84)                  | 1.14 (0.80, 1.64)                                  | 2.07 (1.31, 3.28)                       |
| Model 2 <sup>‡</sup>         | 1.00 (ref)                       | 1.31 (0.97, 1.75)                  | 1.11 (0.78, 1.60)                                  | 1.87 (1.17, 2.99)                       |
| Model 3 <sup>‡</sup>         | 1.00 (ref)                       | 1.28 (0.95, 1.71)                  | 1.09 (0.76, 1.56)                                  | 1.84 (1.15, 2.95)                       |

Model 1 is adjusted for age at first birth, age in 1989, race/ethnicity, and parental education

Model 2 is additionally adjusted for pre-pregnancy BMI, pre-pregnancy smoking, pre-pregnancy Alternative Healthy Eating Index (AHEI) score (in quintiles), pre-pregnancy alcohol intake, physical activity at age 18, and pre-pregnancy oral contraceptive use

Model 3 is additionally adjusted for pre-pregnancy chronic hypertension, pre-pregnancy hypercholesterolemia, pre-pregnancy type 2 diabetes mellitus, and family history of MI or stroke before age 60

\*Total case numbers differ from those in Table 2 because 3 women experienced an MI and stroke at the same age and are included as events in both the MI and stroke analysis. Person-years are the same for the stroke and MI analyses because women are censored at their first CVD event (MI or stroke), regardless of event type, in both analyses.

<sup>†</sup>Compares preterm (<37 weeks) to term (≥37 weeks)

<sup>‡</sup>Preterm category is split into moderate preterm (≥32 to <37 weeks) and very preterm (<32 weeks)

**Supplementary Table 2.** Hazard ratios (95% confidence intervals) for ever preterm delivery and cardiovascular events (MI and stroke) at age 40 or later, among women with no births at age 40 or later

|                      | Never Preterm:<br>≥37 weeks<br>(n=57,953) | Ever Preterm:<br><37 weeks<br>(n=9,474) | Ever Moderate<br>Preterm:<br>≥32 to <37<br>weeks<br>(n=6,859) | Ever Very<br>Preterm:<br><32 weeks<br>(n=2,615) | p-trend <sup>§</sup> |
|----------------------|-------------------------------------------|-----------------------------------------|---------------------------------------------------------------|-------------------------------------------------|----------------------|
| Cases/Person-Years*  | 709/1,083,991                             | 163/174,209                             | 98/124,437                                                    | 65/49,772                                       |                      |
| Model 1 <sup>†</sup> | 1.00 (ref)                                | 1.44 (1.21, 1.70)                       | ---                                                           | ---                                             | ---                  |
| Model 2 <sup>†</sup> | 1.00 (ref)                                | 1.39 (1.17, 1.65)                       | ---                                                           | ---                                             | ---                  |
| Model 3 <sup>†</sup> | 1.00 (ref)                                | 1.36 (1.15, 1.62)                       | ---                                                           | ---                                             | ---                  |
| Model 4 <sup>†</sup> | 1.00 (ref)                                | 1.39 (1.17, 1.65)                       | ---                                                           | ---                                             | ---                  |
| Model 1 <sup>‡</sup> | 1.00 (ref)                                | ---                                     | 1.24 (1.00, 1.53)                                             | 1.90 (1.47, 2.45)                               | <0.0001              |
| Model 2 <sup>‡</sup> | 1.00 (ref)                                | ---                                     | 1.22 (0.98, 1.50)                                             | 1.79 (1.38, 2.31)                               | <0.0001              |
| Model 3 <sup>‡</sup> | 1.00 (ref)                                | ---                                     | 1.18 (0.96, 1.46)                                             | 1.76 (1.36, 2.28)                               | <0.0001              |
| Model 4 <sup>‡</sup> | 1.00 (ref)                                | ---                                     | 1.19 (0.97, 1.48)                                             | 1.87 (1.44, 2.43)                               | <0.0001              |

Model 1 is adjusted for age at first birth, age in 1989, race/ethnicity, and parental education

Model 2 is additionally adjusted for pre-pregnancy BMI, pre-pregnancy smoking, pre-pregnancy Alternative Healthy Eating Index (AHEI) score (in quintiles), pre-pregnancy alcohol intake, physical activity at age 18, and pre-pregnancy oral contraceptive use

Model 3 is additionally adjusted for pre-pregnancy chronic hypertension, pre-pregnancy hypercholesterolemia, pre-pregnancy type 2 diabetes mellitus, and family history of MI or stroke before age 60

Model 4 is additionally adjusted for parity at age 40

\*Sample size and total case numbers differ from those in Table 2 due to additional exclusion criteria: missing gestation length in the 2<sup>nd</sup> pregnancy on, reported gestation length <20 weeks and live birth, had a birth after age 40, or had an MI or stroke before age 40

<sup>†</sup>Compares ever preterm (<37 weeks) to never preterm (≥37 weeks)

<sup>‡</sup>Ever preterm category is split into ever moderate preterm (≥32 to <37 weeks) and ever very preterm (<32 weeks)

<sup>§</sup> For trend test, the measure of prematurity was included model as a continuous variable with most common gestation length as the value to represent each category

**Supplementary Table 3.** Hazard ratios (95% confidence intervals) for preterm delivery in first pregnancy and cardiovascular events (MI and stroke), classified by live and still birth

|                                 | Term*:<br>≥37 weeks<br>(n=63,826) | Moderate<br>Preterm*:<br>≥32 to <37<br>weeks<br>(n=4,697) | Very Preterm<br>Live Birth:<br><32 weeks<br>(n=762) | Very Preterm<br>Stillbirth:<br><32 weeks<br>(n=697) | p-trend <sup>†</sup> |
|---------------------------------|-----------------------------------|-----------------------------------------------------------|-----------------------------------------------------|-----------------------------------------------------|----------------------|
| Cases/Person-Years <sup>‡</sup> | 827/2,018,120                     | 75/142,730                                                | 20/23,088                                           | 23/22,549                                           |                      |
| Model 1                         | 1.00 (ref)                        | 1.31 (1.03, 1.66)                                         | 2.09 (1.34, 3.26)                                   | 2.47 (1.63, 3.73)                                   | <0.0001              |
| Model 2                         | 1.00 (ref)                        | 1.28 (1.01, 1.62)                                         | 2.03 (1.30, 3.16)                                   | 2.11 (1.37, 3.24)                                   | <0.0001              |
| Model 3                         | 1.00 (ref)                        | 1.22 (0.96, 1.55)                                         | 1.98 (1.27, 3.08)                                   | 2.07 (1.35, 3.18)                                   | <0.0001              |

Model 1 is adjusted for age at first birth, age in 1989, race/ethnicity, and parental education

Model 2 is additionally adjusted for pre-pregnancy BMI, pre-pregnancy smoking, pre-pregnancy Alternative Healthy Eating Index (AHEI) score (in quintiles), pre-pregnancy alcohol intake, physical activity at age 18, and pre-pregnancy oral contraceptive use

Model 3 is additionally adjusted for pre-pregnancy chronic hypertension, pre-pregnancy hypercholesterolemia, pre-pregnancy type 2 diabetes mellitus, and family history of MI or stroke before age 60

\*Contains both live births and stillbirths. There are 245 stillbirths in the term group and 75 stillbirths in the moderate preterm group.

<sup>†</sup> For trend test, the measure of prematurity was included model as a continuous variable with most common gestation length as the value to represent each category

<sup>‡</sup>Case numbers and person years differ from Table 2 due to an additional exclusion criterion: missing outcome for the first pregnancy
